# Supplementary material
Source: HighWire-hosted journal article supplement (doi:10.1101/rna.042457.113)
Supplement: SuppMaterial.docx [file SuppMaterial.docx]

**Supplementary Information**

Due to the page limit for supplementary files, the complete record (more than 3000 pages) of detected pseudoknots in all HIV-1 strains (4272) can only be accessed from the corresponding author’s website (<http://chem.siu.edu/_common/documents/du-documents/hiv_supplementary.pdf>). This document is a simplified version of the complete record which only contains results from a small number of strains as the representatives.

**Table of contents**

A) Sequence elements and representations of a typical H-type RNA pseudoknot ₋₋₋₋₋₋₋₋₋₋₋₋₋₋ 2

B) Putative pseudoknots at the *gag-pol* junction of 4272 different strains of HIV-1 ₋₋₋₋₋₋₋₋₋₋₋₋₋ 4

**1.** 4026 strains (94.64%) have all four pseudoknots PK1, PK2, PK3, and PK4 ₋₋₋₋₋₋₋₋₋₋₋ 4

**2.** 87 strains (2.05%) have three pseudoknots PK1, PK3, and PK4 ₋₋₋₋₋₋₋₋₋₋₋₋₋₋₋₋₋₋₋₋₋₋₋ 12

**3.** 24 strains (0.56%) have three pseudoknots PK1, PK2, and PK4 ₋₋₋₋₋₋₋₋₋₋₋₋₋₋₋₋₋₋₋₋₋₋₋ 16

**4.** 34 strains (0.80%) have three pseudoknots PK2, PK3, and PK4 ₋₋₋₋₋₋₋₋₋₋₋₋₋₋₋₋₋₋₋₋₋₋₋ 17

**5.** 15 strains (0.35%) have three pseudoknots PK1, PK2, and PK3 ₋₋₋₋₋₋₋₋₋₋₋₋₋₋₋₋₋₋₋₋₋₋₋ 18

**6.** 14 strains (0.33%) have two pseudoknots PK1, and PK4 ₋₋₋₋₋₋₋₋₋₋₋₋₋₋₋₋₋₋₋₋₋₋₋₋₋₋₋₋₋₋₋₋ 19

**7.** 1 strains (0.02%) have two pseudoknots PK1, and PK3 ₋₋₋₋₋₋₋₋₋₋₋₋₋₋₋₋₋₋₋₋₋₋₋₋₋₋₋₋₋₋₋₋₋₋ 23

**8.** 3 strains (0.07%) have two pseudoknots PK1, and PK2 ₋₋₋₋₋₋₋₋₋₋₋₋₋₋₋₋₋₋₋₋₋₋₋₋₋₋₋₋₋₋₋₋₋₋ 24

**9.** 0 strains (0.00%) have two pseudoknots PK2, and PK3 ₋₋₋₋₋₋₋₋₋₋₋₋₋₋₋₋₋₋₋₋₋₋₋₋₋₋₋₋₋₋₋₋₋₋ 24

**10.** 1 strains (0.02%) have two pseudoknots PK2, and PK4 ₋₋₋₋₋₋₋₋₋₋₋₋₋₋₋₋₋₋₋₋₋₋₋₋₋₋₋₋₋₋₋₋ 24

**11.** 8 strains (0.19%) have two pseudoknots PK3, and PK4 ₋₋₋₋₋₋₋₋₋₋₋₋₋₋₋₋₋₋₋₋₋₋₋₋₋₋₋₋₋₋₋₋ 25

**12.** 1 strains (0.02%) have one pseudoknot PK1 ₋₋₋₋₋₋₋₋₋₋₋₋₋₋₋₋₋₋₋₋₋₋₋₋₋₋₋₋₋₋₋₋₋₋₋₋₋₋₋₋₋₋₋₋₋₋ 25

**13.** 1 strains (0.02%) have one pseudoknot PK2 ₋₋₋₋₋₋₋₋₋₋₋₋₋₋₋₋₋₋₋₋₋₋₋₋₋₋₋₋₋₋₋₋₋₋₋₋₋₋₋₋₋₋₋₋₋₋ 25

**14.** 0 strains (0.00%) have one pseudoknot PK3 ₋₋₋₋₋₋₋₋₋₋₋₋₋₋₋₋₋₋₋₋₋₋₋₋₋₋₋₋₋₋₋₋₋₋₋₋₋₋₋₋₋₋₋₋₋₋ 25

**15.** 3 strains (0.07%) have one pseudoknot PK4 ₋₋₋₋₋₋₋₋₋₋₋₋₋₋₋₋₋₋₋₋₋₋₋₋₋₋₋₋₋₋₋₋₋₋₋₋₋₋₋₋₋₋₋₋₋₋ 25

**16.** 54 strains (1.27%) have none of PK1-PK4 pseudoknots ₋₋₋₋₋₋₋₋₋₋₋₋₋₋₋₋₋₋₋₋₋₋₋₋₋₋₋₋₋₋₋₋ 26

**17.** 8 strains have no frameshift site ₋₋₋₋₋₋₋₋₋₋₋₋₋₋₋₋₋₋₋₋₋₋₋₋₋₋₋₋₋₋₋₋₋₋₋₋₋₋₋₋₋₋₋₋₋₋₋₋₋₋₋₋₋₋₋₋₋₋₋₋₋₋ 27

**18.** 10 strains have invalid characters within small range of frameshift site ₋₋₋₋₋₋₋₋₋₋₋₋₋₋₋₋ 27

**A) Sequence elements and representations of a typical H-type RNA pseudoknot**

A typical H-type RNA pseudoknot contains two helical stems: stem 1 (S1) & stem 2 (S2), and two or three loops: loop 1 (L1), loop 2 (L2), and loop 3 (L3), with L3 being optional. S1 is formed by paring of the complementary sequences S1-5’ and S1-3’, while S2 is formed by paring of the complementary sequences S2-5’ and S2-3’. The arrangement of the sequence elements for forming a H-type pseudoknots in a primary RNA sequence is shown in panel A of Figure 1. To form a pseudoknot, S1 and S2 have to form simultaneously. There are two major different ways to draw the secondary structure of a H-type pseudoknot, as illustrated in panels B and C of Figure 1. In the absence of a L3, S1 and S2 can stack co-axially to form a quasi-continuous helix, with L1 crossing the major groove of S1, and L2 crossing the minor groove of S1. L1 and L2 locate on the same side of the helix. The representation in panel C is used to draw representative pseudoknots in the manuscript. However, this way of drawing pseudoknot is not suitable for generating outputs by the pseudoknot-detecting computer program.


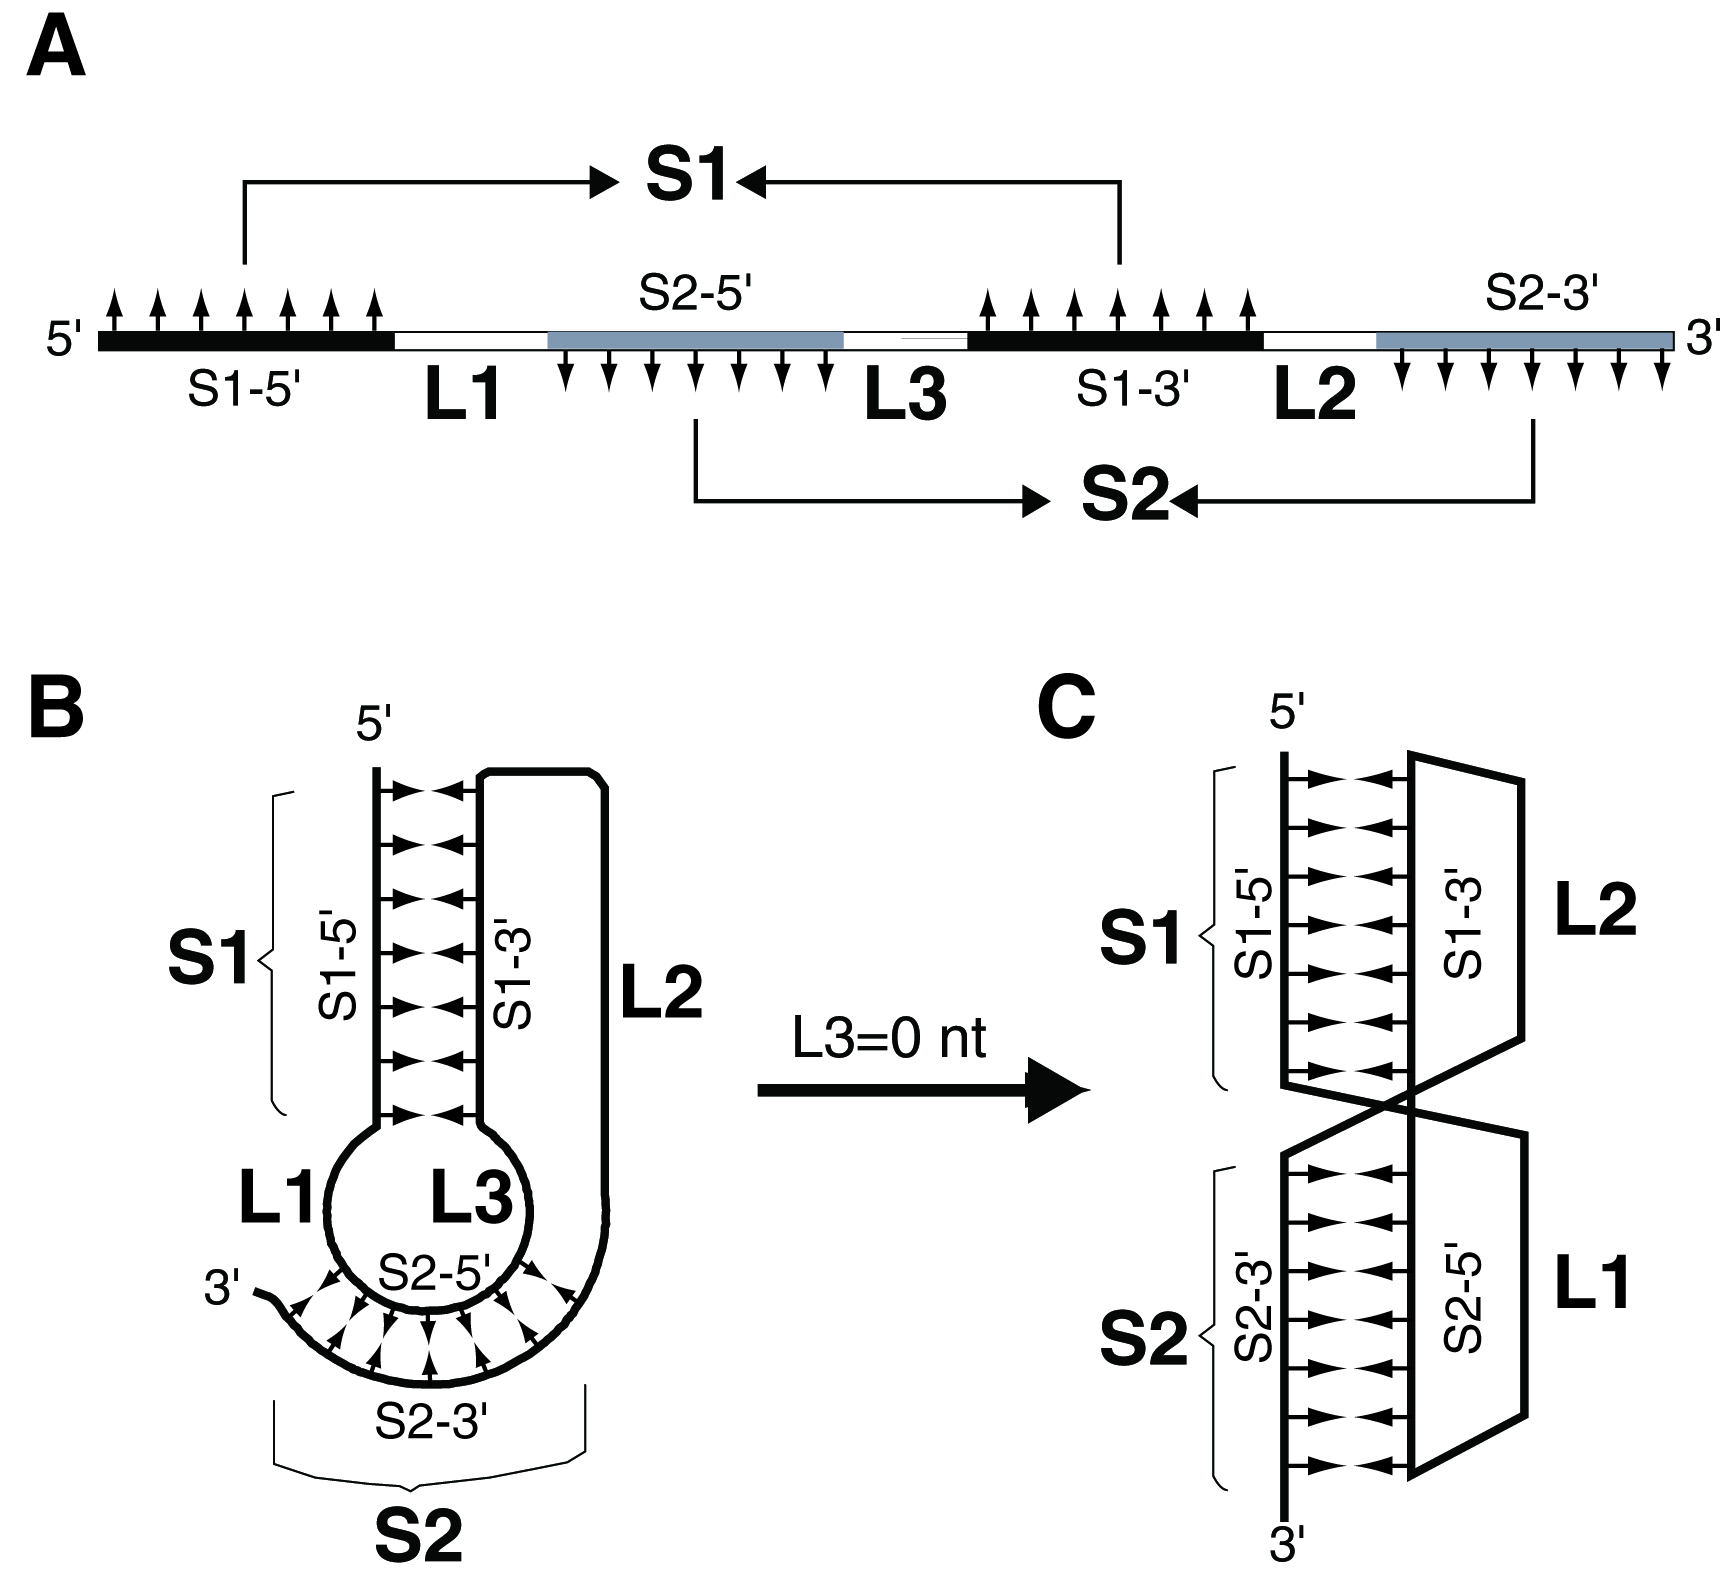


**Figure 1:** Sequence elements and representations of a typical H-type RNA pseudoknot. Abbreviations used are: S1, stem1; S2, stem2; S1-5’ and S1-3’, the 5’ and 3’ strands of stem1; S2-5’ and S2-3’, the 5’ and 3’ strands of stem2; L1, loop1; L2, loop2; L3, loop3. **A:** linear sequential arrangement of the pseudoknot-forming sequence elements. Complementary strands forming S1 and S2 are painted black and gray respectively. Small arrows indicated the complementarities of the strands. A pseudoknot requires that both S1 and S2 can form simultaneously. **B:** Schematic representation of folded pseudoknots with a non-zero L3. **C:** with the absence of L3, S1 and S2 can stack coaxially to form a quasi-continuous double helix. L1 and L2 are located on the same side of the molecule, with L1 crossing the major groove of S2 and L2 crossing the minor groove of S1.


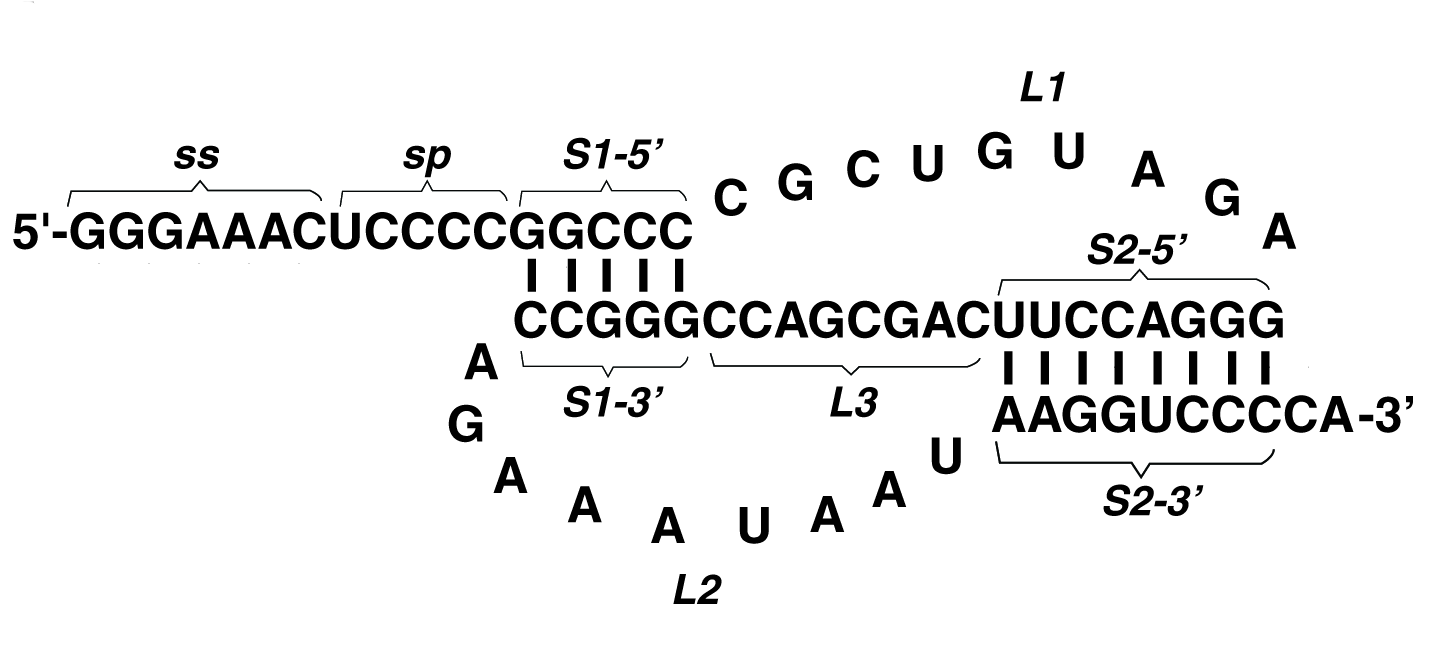


**Figure 2:** A computer-friendly way of drawing the secondary structure of a typical H-type pseudoknot. The slippery sequence (ss) and the spcer region (sp) preceding the frameshift-stimulating pseudoknot are also included.

*
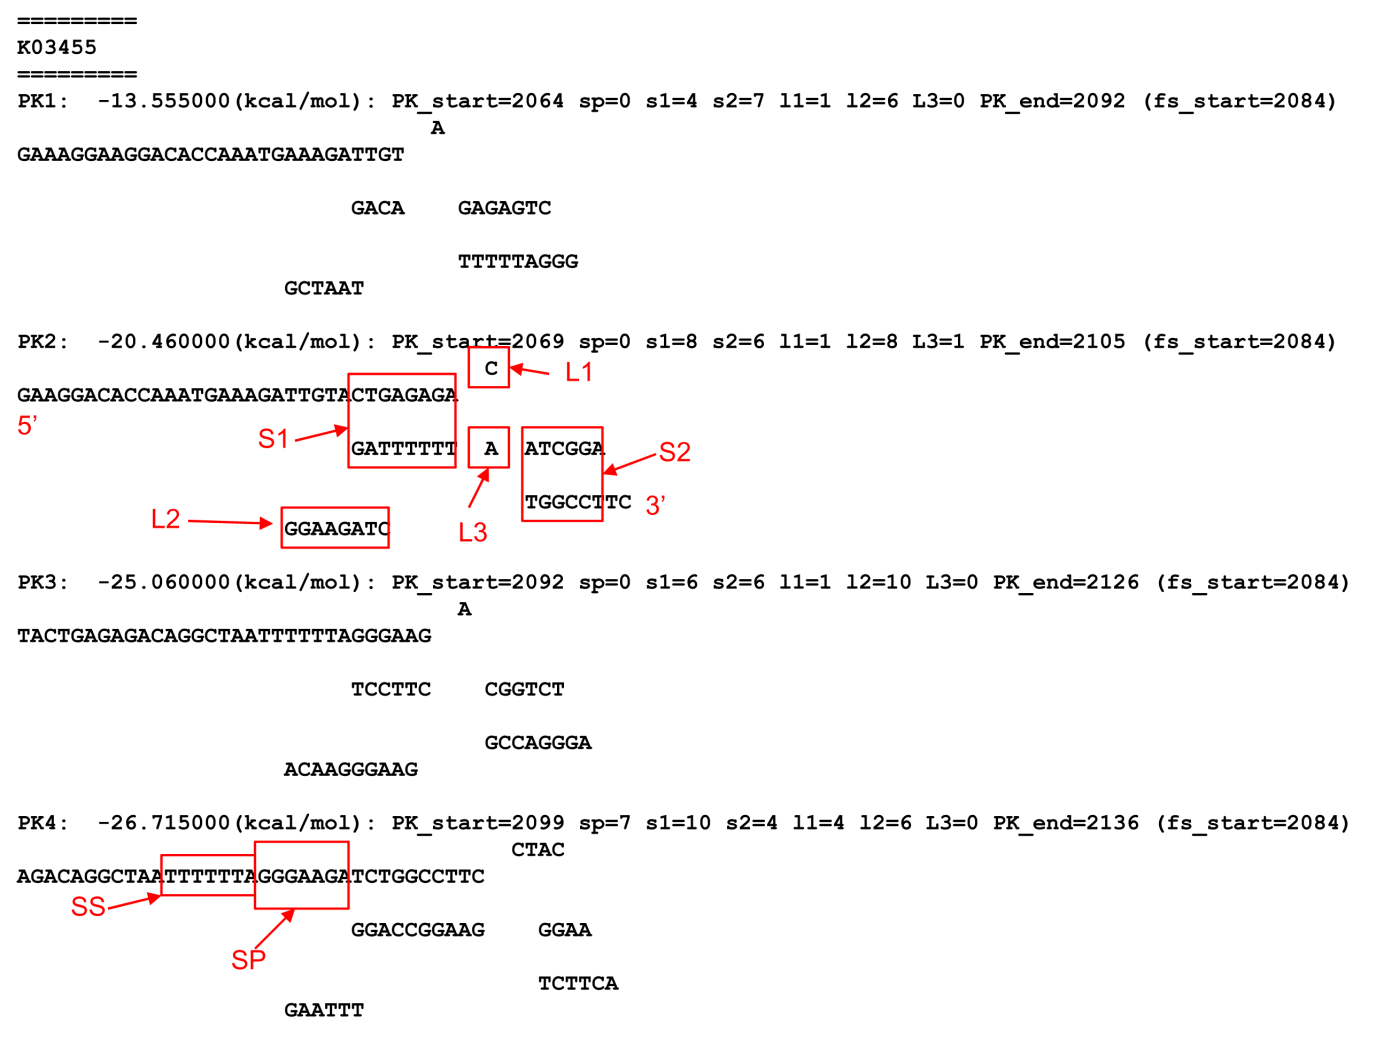
*

**Figure 3:** The computer-generated output for the four detected pseudoknots (PK1-PK4) at the *gag-pol* junction of the reference strain (HXB2) of HIV-1 (GenBank accession No. K03455). The free energy (∆Go37) values for the two stems S1 and S2 are calculated and indicated. The output also indicates the starting/ending positions of the pseudoknot-forming sequence, the number of nucleotides in the spacer region (sp), and stems/loops of the pseudoknot. Note that when the slippery sequence (TTTTTTA) part of the pseudoknot-forming sequence (in PK1 and PK2), sp is meaningless (indicated as 0).

To conveniently show the sequence elements and base-paring scheme of a detected pseudoknot, the representation in panel B of Figure 1 is adopted by the pseudoknot-detecting computer program, but with both stems S1 and S2 drawn horizontally. Figure 2 shows a graphic representation of a real case of frameshift-stimulating pseudoknolt, including the 5’- slippery sequence and spacer region.

In a computer-generated output (Figure 3), the sequence elements of the detected pseudoknot and a sequence of 25 nt preceding the pseudoknot are shown in five lines. The first line is for L1. The second line is for S1-5’ plus the preceding sequence (which may contain the slippery sequence and spacer region). The third line is for S1-3’, L3, and S2-5’ (L3 may be absent). Note that the 5’🡪 3’ orientation of the sequence in the third line runs from the right to the left, which is opposite to the sequences in all the other lines. The fourth line is for S2-3’ plus 2nt 3’- to the pseudoknot. The last line is for L2.

For many strains, PK4 has an alternative potential structure, which is shown as PK4B.

**B) Putative pseudoknots at the *gag-pol* junction of 4272 different strains of HIV-1**

1. 4026 strains (94.44%) have all four pseudoknots PK1, PK2, PK3, and PK4

=============

(1) A04321

=============

PK1: -13.555000(kcal/mol): PK_start=1610 sp=0 s1=4 s2=7 l1=1 l2=6 L3=0 PK_end=1638 (fs_start=1630)

A

GAAAGGAAGGACACCAAATGAAAGATTGT

GACA GAGAGTC

TTTTTAGGG

GCTAAT

PK2: -20.460000(kcal/mol): PK_start=1615 sp=0 s1=8 s2=6 l1=1 l2=8 L3=1 PK_end=1651 (fs_start=1630)

C

GAAGGACACCAAATGAAAGATTGTACTGAGAGA

GATTTTTT A ATCGGA

TGGCCTTC

GGAAGATC

PK3: -25.060000(kcal/mol): PK_start=1638 sp=0 s1=6 s2=6 l1=1 l2=10 L3=0 PK_end=1672 (fs_start=1630)

A

TACTGAGAGACAGGCTAATTTTTTAGGGAAG

TCCTTC CGGTCT

GCCAGGGA

ACAAGGGAAG

PK4: -26.715000(kcal/mol): PK_start=1645 sp=7 s1=10 s2=4 l1=4 l2=6 L3=0 PK_end=1682 (fs_start=1630)

CTAC

AGACAGGCTAATTTTTTAGGGAAGATCTGGCCTTC

GGACCGGAAG GGAA

TCTTCA

GAATTT

=============

(2) A07108

=============

PK1: -10.630000(kcal/mol): PK_start=1602 sp=0 s1=3 s2=7 l1=1 l2=18 L3=0 PK_end=1640 (fs_start=1633)

C

TTGGAGATGTGGAAAGGAAGGACACCAA

GTT AGAAAAT

TTTTTTAGG

CACTGAGAGACAGGCTAA

PK2: -21.940000(kcal/mol): PK_start=1618 sp=0 s1=8 s2=7 l1=1 l2=7 L3=0 PK_end=1655 (fs_start=1633)

C

GAAGGACACCAACTAAAAGATTGCACTGAGAGA

GATTTTTT AATCGGA

TTGGCCTTC

GGAGAAT

PK3: -17.120000(kcal/mol): PK_start=1641 sp=0 s1=5 s2=6 l1=2 l2=11 L3=0 PK_end=1675 (fs_start=1633)

AA

CACTGAGAGACAGGCTAATTTTTTAGGGAG

CCTTC CGGTTT

GCCGGGGA

CACAAGGGAAG

PK4: -19.745000(kcal/mol): PK_start=1648 sp=7 s1=8 s2=4 l1=8 l2=6 L3=0 PK_end=1685 (fs_start=1633)

TCCCACAA

AGACAGGCTAATTTTTTAGGGAGAATTTGGCCT

GGGCCGGA AGGG

TCTCCA

GAACTT

=============

(3) A07116

=============

PK1: -15.100000(kcal/mol): PK_start=1642 sp=0 s1=3 s2=8 l1=2 l2=5 L3=0 PK_end=1670 (fs_start=1662)

CA

GGAAGGAAGGACACCAAATGAAAGACTG

GAC AGAGAGTC

TTTTTTAGGG

GCTAA

PK2: -21.940000(kcal/mol): PK_start=1647 sp=0 s1=8 s2=7 l1=1 l2=7 L3=0 PK_end=1684 (fs_start=1662)

C

GAAGGACACCAAATGAAAGACTGCACTGAGAGA

GATTTTTT AATCGGA

TTGGCCTTC

GGAAAAT

PK3: -23.745000(kcal/mol): PK_start=1670 sp=0 s1=4 s2=8 l1=3 l2=8 L3=0 PK_end=1704 (fs_start=1662)

AAA

CACTGAGAGACAGGCTAATTTTTTAGGGA

CCCT TCCGGTTT

AGGCCAGGGA

ACAAGGGA

PK4: -25.490000(kcal/mol): PK_start=1677 sp=7 s1=10 s2=4 l1=4 l2=6 L3=0 PK_end=1714 (fs_start=1662)

CCAC

AGACAGGCTAATTTTTTAGGGAAAATTTGGCCTTC

GGACCGGAAG GGAA

CCTTCA

GAATTT

=============

(246) AB485660

=============

PK1: -11.460000(kcal/mol): PK_start=2103 sp=0 s1=3 s2=6 l1=4 l2=5 L3=0 PK_end=2129 (fs_start=2123)

CACC

GAAAGGAGGGACATCAAATGAAAGACTG

GAC AGAAAG

TTTTTTAG

GCTAA

PK2: -17.220000(kcal/mol): PK_start=2110 sp=0 s1=6 s2=6 l1=1 l2=10 L3=1 PK_end=2144 (fs_start=2123)

C

GGGACATCAAATGAAAGACTGCACCGAAAGA

TTTTTT A ATCGGA

TGGCCTTC

AGGGAAAATC

PK3: -23.815000(kcal/mol): PK_start=2132 sp=0 s1=3 s2=8 l1=3 l2=9 L3=0 PK_end=2165 (fs_start=2123)

AAA

ACCGAAAGACAGGCTAATTTTTTAGGGA

CCT TCCGGTCT

AGGCCAGGGA

AACAAGGGG

PK4: -30.395000(kcal/mol): PK_start=2138 sp=7 s1=8 s2=4 l1=8 l2=32 L3=0 PK_end=2201 (fs_start=2123)

TCCAACAA

AGACAGGCTAATTTTTTAGGGAAAATCTGGCCT

GGACCGGA GGGG

CCCCAC

GAATTTTATCCAGAACAGGCCAGAGCCAACAG

=============

(247) AB485661

=============

PK1: -11.460000(kcal/mol): PK_start=2103 sp=0 s1=3 s2=6 l1=4 l2=5 L3=0 PK_end=2129 (fs_start=2123)

CACC

GAAAGGAGGGACATCAAATGAAAGACTG

GAC AGAAAG

TTTTTTAG

GCTAA

PK2: -17.220000(kcal/mol): PK_start=2110 sp=0 s1=6 s2=6 l1=1 l2=10 L3=1 PK_end=2144 (fs_start=2123)

C

GGGACATCAAATGAAAGACTGCACCGAAAGA

TTTTTT A ATCGGA

TGGCCTTC

AGGGAAAATC

PK3: -23.815000(kcal/mol): PK_start=2132 sp=0 s1=3 s2=8 l1=3 l2=9 L3=0 PK_end=2165 (fs_start=2123)

AAA

ACCGAAAGACAGGCTAATTTTTTAGGGA

CCT TCCGGTCT

AGGCCAGGGA

AACAAGGGG

PK4: -30.395000(kcal/mol): PK_start=2138 sp=7 s1=8 s2=4 l1=8 l2=32 L3=0 PK_end=2201 (fs_start=2123)

TCCAACAA

AGACAGGCTAATTTTTTAGGGAAAATCTGGCCT

GGACCGGA GGGG

CCCCAC

GAATTTTATCCAGAACAGGCCAGAGCCAACAG

=============

(248) AB485662

=============

PK1: -11.460000(kcal/mol): PK_start=2088 sp=0 s1=3 s2=6 l1=4 l2=5 L3=0 PK_end=2114 (fs_start=2108)

CACG

GAAAGGAGGGACATCAAATGAAAGACTG

GAC AGAAAG

TTTTTTAG

GCTAA

PK2: -18.800000(kcal/mol): PK_start=2095 sp=0 s1=6 s2=7 l1=1 l2=9 L3=0 PK_end=2130 (fs_start=2108)

C

GGGACATCAAATGAAAGACTGCACGGAAAGA

TTTTTT AATCGGA

TTGGCCTTC

AGGGAAAAT

PK3: -20.285000(kcal/mol): PK_start=2117 sp=0 s1=3 s2=8 l1=3 l2=9 L3=0 PK_end=2150 (fs_start=2108)

AAA

ACGGAAAGACAGGCTAATTTTTTAGGGA

CCT TCCGGTTT

AGGCCAGGGA

AACAAGGGG

PK4: -22.705000(kcal/mol): PK_start=2123 sp=7 s1=10 s2=4 l1=4 l2=6 L3=0 PK_end=2160 (fs_start=2108)

CAAC

AGACAGGCTAATTTTTTAGGGAAAATTTGGCCTTC

GGACCGGAGG GGAA

TCTTCA

GAATTT

PK4B: -26.865000(kcal/mol): PK_start=2123 sp=7 s1=8 s2=4 l1=8 l2=32 L3=0 PK_end=2186 (fs_start=2108)

TCCAACAA

AGACAGGCTAATTTTTTAGGGAAAATTTGGCCT

GGACCGGA GGGG

CCCCAC

GAATTTTCTTCAGAACAGGCCAGAGCCAACAG

=============

(249) AB485663

=============

PK1: -11.460000(kcal/mol): PK_start=2089 sp=0 s1=3 s2=6 l1=4 l2=5 L3=0 PK_end=2115 (fs_start=2109)

CACG

GAAAGGAGGGACATCAAATGAAAGACTG

GAC AGAAAG

TTTTTTAG

GCTAA

PK2: -18.800000(kcal/mol): PK_start=2096 sp=0 s1=6 s2=7 l1=1 l2=9 L3=0 PK_end=2131 (fs_start=2109)

C

GGGACATCAAATGAAAGACTGCACGGAAAGA

TTTTTT AATCGGA

TTGGCCTTC

AGGGAAAAT

PK3: -20.285000(kcal/mol): PK_start=2118 sp=0 s1=3 s2=8 l1=3 l2=9 L3=0 PK_end=2151 (fs_start=2109)

AAA

ACGGAAAGACAGGCTAATTTTTTAGGGA

CCT TCCGGTTT

AGGCCAGGGA

AACAAGGGG

PK4: -22.705000(kcal/mol): PK_start=2124 sp=7 s1=10 s2=4 l1=4 l2=6 L3=0 PK_end=2161 (fs_start=2109)

CAAC

AGACAGGCTAATTTTTTAGGGAAAATTTGGCCTTC

GGACCGGAGG GGAA

TCTTCA

GAATTT

PK4B: -26.865000(kcal/mol): PK_start=2124 sp=7 s1=8 s2=4 l1=8 l2=32 L3=0 PK_end=2187 (fs_start=2109)

TCCAACAA

AGACAGGCTAATTTTTTAGGGAAAATTTGGCCT

GGACCGGA GGGG

CCCCAC

GAATTTTCTTCAGAACAGGCCAGAGCCAACAG

=============

(250) AB485664

=============

PK1: -11.460000(kcal/mol): PK_start=2076 sp=0 s1=3 s2=6 l1=4 l2=5 L3=0 PK_end=2102 (fs_start=2096)

CACA

GAAAGGAGGGACATCAAATGAAAGACTG

GAC AGAAAG

TTTTTTAG

GCTAA

PK2: -17.220000(kcal/mol): PK_start=2083 sp=0 s1=6 s2=6 l1=1 l2=10 L3=1 PK_end=2117 (fs_start=2096)

C

GGGACATCAAATGAAAGACTGCACAGAAAGA

TTTTTT A ATCGGA

TGGCCTTC

AGGGAAAATC

PK3: -23.815000(kcal/mol): PK_start=2105 sp=0 s1=3 s2=8 l1=3 l2=9 L3=0 PK_end=2138 (fs_start=2096)

AAA

ACAGAAAGACAGGCTAATTTTTTAGGGA

CCT TCCGGTCT

AGGCCAGGAA

AACAAGGGG

PK4: -26.235000(kcal/mol): PK_start=2111 sp=7 s1=10 s2=4 l1=4 l2=6 L3=0 PK_end=2148 (fs_start=2096)

CAAC

AGACAGGCTAATTTTTTAGGGAAAATCTGGCCTTC

GGACCGGAGG GGAA

TCTTCA

AAATTT

PK4B: -30.395000(kcal/mol): PK_start=2111 sp=7 s1=8 s2=4 l1=8 l2=32 L3=0 PK_end=2174 (fs_start=2096)

TCCAACAA

AGACAGGCTAATTTTTTAGGGAAAATCTGGCCT

GGACCGGA GGGG

CCCCGC

AAATTTTCTTCAGAGCAGGCCAGAGCCAACAG

=============

(251) AB485665

=============

PK1: -11.460000(kcal/mol): PK_start=2076 sp=0 s1=3 s2=6 l1=4 l2=5 L3=0 PK_end=2102 (fs_start=2096)

CACA

GAAAGGAGGGACATCAAATGAAAGACTG

GAC AGAAAG

TTTTTTAG

GCTAA

PK2: -17.220000(kcal/mol): PK_start=2083 sp=0 s1=6 s2=6 l1=1 l2=10 L3=1 PK_end=2117 (fs_start=2096)

C

GGGACATCAAATGAAAGACTGCACAGAAAGA

TTTTTT A ATCGGA

TGGCCTTC

AGGGAAAATC

PK3: -23.815000(kcal/mol): PK_start=2105 sp=0 s1=3 s2=8 l1=3 l2=9 L3=0 PK_end=2138 (fs_start=2096)

AAA

ACAGAAAGACAGGCTAATTTTTTAGGGA

CCT TCCGGTCT

AGGCCAGGAA

AACAAGGGG

PK4: -26.235000(kcal/mol): PK_start=2111 sp=7 s1=10 s2=4 l1=4 l2=6 L3=0 PK_end=2148 (fs_start=2096)

CAAC

AGACAGGCTAATTTTTTAGGGAAAATCTGGCCTTC

GGACCGGAGG GGAA

TCTTCA

AAATTT

PK4B: -30.395000(kcal/mol): PK_start=2111 sp=7 s1=8 s2=4 l1=8 l2=32 L3=0 PK_end=2174 (fs_start=2096)

TCCAACAA

AGACAGGCTAATTTTTTAGGGAAAATCTGGCCT

GGACCGGA GGGG

CCCCGC

AAATTTTCTTCAGAGCAGGCCAGAGCCAACAG

=============

(3907) K03455

=============

PK1: -13.555000(kcal/mol): PK_start=2064 sp=0 s1=4 s2=7 l1=1 l2=6 L3=0 PK_end=2092 (fs_start=2084)

A

GAAAGGAAGGACACCAAATGAAAGATTGT

GACA GAGAGTC

TTTTTAGGG

GCTAAT

PK2: -20.460000(kcal/mol): PK_start=2069 sp=0 s1=8 s2=6 l1=1 l2=8 L3=1 PK_end=2105 (fs_start=2084)

C

GAAGGACACCAAATGAAAGATTGTACTGAGAGA

GATTTTTT A ATCGGA

TGGCCTTC

GGAAGATC

PK3: -25.060000(kcal/mol): PK_start=2092 sp=0 s1=6 s2=6 l1=1 l2=10 L3=0 PK_end=2126 (fs_start=2084)

A

TACTGAGAGACAGGCTAATTTTTTAGGGAAG

TCCTTC CGGTCT

GCCAGGGA

ACAAGGGAAG

PK4: -26.715000(kcal/mol): PK_start=2099 sp=7 s1=10 s2=4 l1=4 l2=6 L3=0 PK_end=2136 (fs_start=2084)

CTAC

AGACAGGCTAATTTTTTAGGGAAGATCTGGCCTTC

GGACCGGAAG GGAA

TCTTCA

GAATTT

=============

(3908) KC156114

=============

PK1: -14.985000(kcal/mol): PK_start=2055 sp=0 s1=4 s2=7 l1=1 l2=6 L3=0 PK_end=2083 (fs_start=2075)

A

GAAAGGAAGGACACCAAATGAAAGACTGT

GACG GAGAGTC

TTTTTAGGG

GCTAAT

PK2: -20.330000(kcal/mol): PK_start=2060 sp=0 s1=8 s2=7 l1=1 l2=7 L3=0 PK_end=2097 (fs_start=2075)

C

GAAGGACACCAAATGAAAGACTGTACTGAGAGG

GATTTTTT AATCGGA

TTGGCCTTC

GGAAAAT

PK3: -23.745000(kcal/mol): PK_start=2083 sp=0 s1=4 s2=8 l1=3 l2=8 L3=0 PK_end=2117 (fs_start=2075)

AAA

TACTGAGAGGCAGGCTAATTTTTTAGGGA

CCCT TCCGGTTT

AGGCCAGGGA

ACAAGGGA

PK4: -25.490000(kcal/mol): PK_start=2090 sp=7 s1=10 s2=4 l1=4 l2=6 L3=0 PK_end=2127 (fs_start=2075)

CCAC

AGGCAGGCTAATTTTTTAGGGAAAATTTGGCCTTC

GGACCGGAAG GGAA

CCTTCA

GAATTT

**2.** 87 strains (2.05%) have three pseudoknots PK1, PK3, and PK4

=============

(1) AB097871

=============

PK1: -11.500000(kcal/mol): PK_start=1412 sp=0 s1=3 s2=7 l1=5 l2=17 L3=1 PK_end=1453 (fs_start=1447)

CCAAA

GCTGTTGGAAATGTGGACAGGAAGGACA

TGT C AGAAAGT

TTTTTTAGG

ACAGACAGGCAGGCTAA

PK3: -23.695000(kcal/mol): PK_start=1455 sp=0 s1=3 s2=9 l1=3 l2=9 L3=0 PK_end=1490 (fs_start=1447)

AAA

TACAGACAGGCAGGCTAATTTTTTAGGA

CCT TCCGGTTTC

AGGCCAGGGAA

CACAAGGGG

PK4: -26.595000(kcal/mol): PK_start=1461 sp=6 s1=9 s2=4 l1=8 l2=6 L3=0 PK_end=1500 (fs_start=1447)

TCCCACAA

CAGGCAGGCTAATTTTTTAGGAAAACTTTGGCCT

GGGACCGGA GGGG

CTCCAG

AATTTC

PK4B: -29.475000(kcal/mol): PK_start=1461 sp=6 s1=9 s2=4 l1=8 l2=31 L3=0 PK_end=1525 (fs_start=1447)

TCCCACAA

CAGGCAGGCTAATTTTTTAGGAAAACTTTGGCCT

GGGACCGGA GGGG

CCCCAC

AATTTCCTCCAGAGCAGACCAGAGCCAACAG

=============

(11) AJ302646

=============

PK1: -10.640000(kcal/mol): PK_start=2116 sp=0 s1=3 s2=7 l1=1 l2=21 L3=0 PK_end=2157 (fs_start=2150)

A

CTGGAAATGTGGACAGGAAGGTCACCAA

GTT AGAAAGT

TTTTTTAGG

CAAAAATGGAAGACAGGCAAA

PK3: -22.080000(kcal/mol): PK_start=2159 sp=0 s1=3 s2=6 l1=4 l2=11 L3=0 PK_end=2191 (fs_start=2150)

AATA

AATGGAAGACAGGCAAATTTTTTAGGGA

CCT CCGGTC

GGCCAGGC

GGGGGGCACGA

PK4: -40.110000(kcal/mol): PK_start=2166 sp=8 s1=8 s2=8 l1=2 l2=20 L3=0 PK_end=2219 (fs_start=2150)

CG

GACAGGCAAATTTTTTAGGGAAATACTGGCCTC

GACCGGAG CACGGGGG

GTGTCCCCAT

GCAATTATGCGCAGAGACAA

PK4B: -33.960000(kcal/mol): PK_start=2166 sp=8 s1=8 s2=5 l1=3 l2=32 L3=2 PK_end=2226 (fs_start=2150)

CGG

GACAGGCAAATTTTTTAGGGAAATACTGGCCTC

GACCGGAG CA CGGGG

GCCCCAC

GCAATTATGCGCAGAGACAAGTGTCCCCATCA

=============

(12) AJ302647

=============

PK1: -10.640000(kcal/mol): PK_start=2116 sp=0 s1=3 s2=7 l1=1 l2=21 L3=0 PK_end=2157 (fs_start=2150)

A

CTGGAAATGTGGACAGGAAGGTCACCAA

GTT AGAAAGT

TTTTTTAGG

CAGAAATGGAAAACAGGCAAA

PK3: -22.080000(kcal/mol): PK_start=2159 sp=0 s1=3 s2=6 l1=4 l2=11 L3=0 PK_end=2191 (fs_start=2150)

AATA

AATGGAAAACAGGCAAATTTTTTAGGGA

CCT CCGGTC

GGCCAGGC

GGGGGGCACGA

PK4: -40.110000(kcal/mol): PK_start=2166 sp=8 s1=8 s2=8 l1=2 l2=20 L3=0 PK_end=2219 (fs_start=2150)

CG

AACAGGCAAATTTTTTAGGGAAATACTGGCCTC

GACCGGAG CACGGGGG

GTGTCCCCAT

GCAATTATGCACAGAGACAA

PK4B: -33.960000(kcal/mol): PK_start=2166 sp=8 s1=8 s2=5 l1=3 l2=32 L3=2 PK_end=2226 (fs_start=2150)

CGG

AACAGGCAAATTTTTTAGGGAAATACTGGCCTC

GACCGGAG CA CGGGG

GCCCCAC

GCAATTATGCACAGAGACAAGTGTCCCCATCA

=============

(26) AY618998

=============

PK1: -10.640000(kcal/mol): PK_start=2120 sp=0 s1=3 s2=7 l1=1 l2=21 L3=0 PK_end=2161 (fs_start=2154)

A

CTGGAAATGTGGACAGGAAGGTCACCAA

GTT AGAAAGT

TTTTTTAGG

CAGAAATGGAAAACAGGCAAA

PK3: -22.080000(kcal/mol): PK_start=2163 sp=0 s1=3 s2=6 l1=4 l2=11 L3=0 PK_end=2195 (fs_start=2154)

AATA

AATGGAAAACAGGCAAATTTTTTAGGGA

CCT CCGGTC

GGCCAGGC

GGGGGGCACGA

PK4: -42.750000(kcal/mol): PK_start=2170 sp=8 s1=8 s2=8 l1=2 l2=20 L3=0 PK_end=2223 (fs_start=2154)

CG

AACAGGCAAATTTTTTAGGGAAATACTGGCCTC

GACCGGAG CACGGGGG

GTGCCCCCAT

GCAATTATGCACAGAGACAA

PK4B: -36.700000(kcal/mol): PK_start=2170 sp=8 s1=8 s2=7 l1=1 l2=32 L3=2 PK_end=2232 (fs_start=2154)

C

AACAGGCAAATTTTTTAGGGAAATACTGGCCTC

GACCGGAG CA CGGGGGG

GCCCCTCCA

GCAATTATGCACAGAGACAAGTGCCCCCATCA

=============

(66) JX245014

=============

PK1: -11.580000(kcal/mol): PK_start=1287 sp=0 s1=4 s2=6 l1=5 l2=6 L3=0 PK_end=1317 (fs_start=1310)

AGAaa

GACAGGAAGGTCACCAAATGAAAGATTGC

GACG AAAGGt

TTTTTAGG

GCGAAT

PK3: -24.490000(kcal/mol): PK_start=1318 sp=0 s1=4 s2=6 l1=4 l2=10 L3=0 PK_end=1351 (fs_start=1310)

AGTA

AaatGGAAAGCAGGCGAATTTTTTAGGGA

TCCT CCGGTC

GGCCAGGC

GGGGGcacgA

PK4: -41.120000(kcal/mol): PK_start=1326 sp=8 s1=8 s2=9 l1=1 l2=20 L3=0 PK_end=1380 (fs_start=1310)

C

AGCAGGCGAATTTTTTAGGGAAGTACTGGCCTC

GACCGGAg cacGGGGGT

GTGTCCCCATC

GCAATTATGTGCAGAAACAA

PK4B: -33.960000(kcal/mol): PK_start=1326 sp=8 s1=8 s2=5 l1=3 l2=32 L3=2 PK_end=1386 (fs_start=1310)

CTG

AGCAGGCGAATTTTTTAGGGAAGTACTGGCCTC

GACCGGAg ca cGGGG

GCCCCAC

GCAATTATGTGCAGAAACAAGTGTCCCCATCA

=============

(87) L20571

=============

PK1: -10.640000(kcal/mol): PK_start=2092 sp=0 s1=3 s2=7 l1=1 l2=21 L3=0 PK_end=2133 (fs_start=2126)

A

CTGGAAATGTGGACAGGAAGGTCACCAA

GTT AGAAAGT

TTTTTTAGG

CAAAAATGGAAGACAGGCAAA

PK3: -22.080000(kcal/mol): PK_start=2135 sp=0 s1=3 s2=6 l1=4 l2=11 L3=0 PK_end=2167 (fs_start=2126)

AGTA

AATGGAAGACAGGCAAATTTTTTAGGGA

CCT CCGGTC

GGCCAGGC

GGGGGGCACGA

PK4: -40.110000(kcal/mol): PK_start=2142 sp=8 s1=8 s2=8 l1=2 l2=20 L3=0 PK_end=2195 (fs_start=2126)

CG

GACAGGCAAATTTTTTAGGGAAGTACTGGCCTC

GACCGGAG CACGGGGG

GTGTCCCCAT

GCAATTATGTGCAGAAACAA

PK4B: -33.960000(kcal/mol): PK_start=2142 sp=8 s1=8 s2=5 l1=3 l2=32 L3=2 PK_end=2202 (fs_start=2126)

CGG

GACAGGCAAATTTTTTAGGGAAGTACTGGCCTC

GACCGGAG CA CGGGG

GCCCCAC

GCAATTATGTGCAGAAACAAGTGTCCCCATCA

**3.** 24 strains (0.56%) have three pseudoknots PK1, PK2, and PK4

=============

(1) AF407418

=============

PK1: -10.440000(kcal/mol): PK_start=1625 sp=0 s1=3 s2=7 l1=1 l2=21 L3=0 PK_end=1666 (fs_start=1659)

A

CTGGAAATGTGGACAGGAAGGTCATCAA

GTT AGAAAGT

TTTTTTAAA

CAAAAATAGGAGACAGACAAA

PK2: -6.245000(kcal/mol): PK_start=1653 sp=0 s1=3 s2=4 l1=3 l2=4 L3=0 PK_end=1673 (fs_start=1659)

CAA

ATGAAAGATTGCAAAAATAGGAGACAGA

TTT TTTA

AAATAT

AAAG

PK4: -27.680000(kcal/mol): PK_start=1675 sp=8 s1=8 s2=4 l1=6 l2=8 L3=0 PK_end=1712 (fs_start=1659)

CGAGAG

GACAGACAAATTTTTTAAAGAAATATTGGCCTC

GACCGGAG CACG

GTGCAG

GCAATTAT

=============

(24) KC596064

=============

PK1: -15.100000(kcal/mol): PK_start=1436 sp=0 s1=3 s2=8 l1=2 l2=5 L3=0 PK_end=1464 (fs_start=1456)

CA

GGAAAGAAGGACATCAAATGAAAGACTG

GAC AGAGAGTC

TTTTTTAGGG

GCTAA

PK2: -20.460000(kcal/mol): PK_start=1441 sp=0 s1=8 s2=6 l1=1 l2=8 L3=1 PK_end=1477 (fs_start=1456)

C

GAAGGACATCAAATGAAAGACTGCACTGAGAGA

GATTTTTT A ATCGGA

TGGCCTTC

GGAGGCTG

PK4: -25.760000(kcal/mol): PK_start=1469 sp=5 s1=4 s2=7 l1=1 l2=4 L3=0 PK_end=1495 (fs_start=1456)

T

AGAGACAGGCTAATTTTTTAGGGAGGCTG

CGAC CTTCCGG

GGAGGCCAG

AAGG

**4.** 34 strains (0.91%) have three pseudoknots PK2, PK3, and PK4

=============

(1) AF443108

=============

PK2: -18.760000(kcal/mol): PK_start=1431 sp=0 s1=8 s2=6 l1=1 l2=8 L3=1 PK_end=1467 (fs_start=1446)

C

GAGGGACACCAAATGAAAGATTATACTGAAAGG

GATTTTTT A ATCGGA

TGGCCTTC

GGAAAATC

PK3: -27.275000(kcal/mol): PK_start=1454 sp=0 s1=4 s2=8 l1=3 l2=8 L3=0 PK_end=1488 (fs_start=1446)

AAA

TACTGAAAGGCAGGCTAATTTTTTAGGGA

CCCT TCCGGTCT

AGGCCAGGGA

ACAAGGGG

PK4: -27.515000(kcal/mol): PK_start=1461 sp=7 s1=8 s2=4 l1=8 l2=7 L3=0 PK_end=1499 (fs_start=1446)

TCCCACAA

AGGCAGGCTAATTTTTTAGGGAAAATCTGGCCT

GGACCGGA GGGG

CTCCAA

GAATTTC

PK4B: -30.395000(kcal/mol): PK_start=1461 sp=7 s1=8 s2=4 l1=8 l2=32 L3=0 PK_end=1524 (fs_start=1446)

TCCCACAA

AGGCAGGCTAATTTTTTAGGGAAAATCTGGCCT

GGACCGGA GGGG

CCCCAA

GAATTTCCTCCAAAACAGGCCAGAACCAACAG

**5.** 15 strains (0.35%) have three pseudoknots PK1, PK2, and PK3

=============

(1) AY371158

=============

PK1: -15.140000(kcal/mol): PK_start=1254 sp=0 s1=3 s2=8 l1=2 l2=5 L3=0 PK_end=1282 (fs_start=1274)

CA

GAAAGGAAGGACACCAAATGAAAGACTG

GAC AGAAAGTC

TTTTTTAGGG

GCTAA

PK2: -21.980000(kcal/mol): PK_start=1259 sp=0 s1=8 s2=7 l1=1 l2=7 L3=0 PK_end=1296 (fs_start=1274)

C

GAAGGACACCAAATGAAAGACTGCACTGAAAGA

GATTTTTT AATCGGA

TTGGCCTTC

GGAAAAT

PK3: -18.720000(kcal/mol): PK_start=1283 sp=0 s1=4 s2=4 l1=5 l2=10 L3=0 PK_end=1313 (fs_start=1274)

AATTT

ACTGAAAGACAGGCTAATTTTTTAGGGAA

CCTT CCGG

GGCCTG

AACAAAGGGA

**6.** 14 strains (0.33%) have two pseudoknots PK1, and PK4

=============

(3) AY169802

=============

PK1: -10.390000(kcal/mol): PK_start=1548 sp=0 s1=3 s2=7 l1=1 l2=21 L3=0 PK_end=1589 (fs_start=1582)

A

CTGGAACTGTGGGCAGGATGGTCACCAG

GTT AGAAAGT

TTTTTTAGG

CAGAAATGGAAAACAGGCAAA

PK4: -36.700000(kcal/mol): PK_start=1598 sp=8 s1=8 s2=7 l1=1 l2=32 L3=2 PK_end=1660 (fs_start=1582)

C

AACAGGCAAATTTTTTAGGCAAATACTGGCCTC

GACCGGAG CA CGGGGGG

GCCCCTCCG

GCAATTTTATGCAGAAACAAGTGGCCCCATCA

=============

(4) AY169805

=============

PK1: -10.440000(kcal/mol): PK_start=1513 sp=0 s1=3 s2=7 l1=1 l2=21 L3=0 PK_end=1554 (fs_start=1547)

A

CTGGAAATGTGGACAGGAAGGTCATCAA

GTT AGAAAGT

TTTTTTAGG

CAGAAATGGAAARCAGGCAAA

PK4: -42.750000(kcal/mol): PK_start=1563 sp=8 s1=8 s2=8 l1=2 l2=20 L3=0 PK_end=1616 (fs_start=1547)

CG

ARCAGGCAAATTTTTTAGGCAAATACTGGCCTC

GACCGGAG CACGGGGG

GTGCCCCCAT

GCAATTATATGCAGAAACAA

PK4B: -33.960000(kcal/mol): PK_start=1563 sp=8 s1=8 s2=5 l1=3 l2=32 L3=2 PK_end=1623 (fs_start=1547)

CGG

ARCAGGCAAATTTTTTAGGCAAATACTGGCCTC

GACCGGAG CA CGGGG

GCCCCAC

GCAATTATATGCAGAAACAAGTGCCCCCATCA

=============

(5) AY169807

=============

PK1: -10.400000(kcal/mol): PK_start=1547 sp=0 s1=3 s2=7 l1=1 l2=21 L3=0 PK_end=1588 (fs_start=1581)

A

CTGGAAATGTGGACAGGAAGGTCATCAA

GTT AGAGAGT

TTTTTTAGG

CAAAAATGGAAAACAGGCAAA

PK4: -42.320000(kcal/mol): PK_start=1597 sp=8 s1=8 s2=8 l1=2 l2=20 L3=0 PK_end=1650 (fs_start=1581)

CG

AACAGGCAAATTTTTTAGGCAAATACTGGCCTC

GACCGGAG CGCGGGGG

GTGCCCCCAT

GCAATTATATGCAGAAACAA

PK4B: -33.960000(kcal/mol): PK_start=1597 sp=8 s1=8 s2=5 l1=3 l2=32 L3=2 PK_end=1657 (fs_start=1581)

CGG

AACAGGCAAATTTTTTAGGCAAATACTGGCCTC

GACCGGAG CG CGGGG

GCCCCAC

GCAATTATATGCAGAAACAAGTGCCCCCATCA

=============

(6) AY169809

=============

PK1: -10.440000(kcal/mol): PK_start=1549 sp=0 s1=3 s2=7 l1=1 l2=21 L3=0 PK_end=1590 (fs_start=1583)

A

CTGGAAATGTGGACAGGAAGGTCATCAA

GTT AGAAAGT

TTTTTTAGG

CAGAAATGGAAAACAGGCAAA

PK4: -42.320000(kcal/mol): PK_start=1599 sp=8 s1=8 s2=8 l1=2 l2=20 L3=0 PK_end=1652 (fs_start=1583)

CG

AACAGGCAAATTTTTTAGGCAGATACTGGCCTC

GACCGGAG CGCGGGGG

GTGCCCCCAT

GCAATTATGTGCAGAAACAA

PK4B: -33.960000(kcal/mol): PK_start=1599 sp=8 s1=8 s2=5 l1=3 l2=32 L3=2 PK_end=1659 (fs_start=1583)

CGG

AACAGGCAAATTTTTTAGGCAGATACTGGCCTC

GACCGGAG CG CGGGG

GCCCCAC

GCAATTATGTGCAGAAACAAGTGCCCCCATCA

=============

(7) AY169811

=============

PK1: -10.640000(kcal/mol): PK_start=1496 sp=0 s1=3 s2=7 l1=1 l2=21 L3=0 PK_end=1537 (fs_start=1530)

A

CTGGAAATGTGGACAGGAAGGTCACCAA

GTT AGAAAGT

TTTTTTAGG

CAAAAATGGAAAACAGGCAAA

PK4: -42.320000(kcal/mol): PK_start=1546 sp=8 s1=8 s2=8 l1=2 l2=20 L3=0 PK_end=1599 (fs_start=1530)

CG

AACAGGCAAATTTTTTAGGCAAATACTGGCCTC

GACCGGAG CGCGGGGG

GTGCCCCCAG

GCAATTATGTGCAGAAACAA

PK4B: -33.960000(kcal/mol): PK_start=1546 sp=8 s1=8 s2=5 l1=3 l2=41 L3=2 PK_end=1615 (fs_start=1530)

CGG

AACAGGCAAATTTTTTAGGCAAATACTGGCCTC

GACCGGAG CG CGGGG

GCCCCAC

GCAATTATGTGCAGAAACAAGTGCCCCCAGCAACCCCATCA

=============

(8) AY169816

=============

PK1: -10.640000(kcal/mol): PK_start=1548 sp=0 s1=3 s2=7 l1=1 l2=21 L3=0 PK_end=1589 (fs_start=1582)

A

CTGGAAATGTGGACAGGAAGGTCACCAA

GTT AGAAAGT

TTTTTTAGG

CAGAAATGGAAAACAGGCAAA

PK4: -34.180000(kcal/mol): PK_start=1598 sp=8 s1=8 s2=6 l1=1 l2=25 L3=3 PK_end=1651 (fs_start=1582)

C

AACAGGCAAATTTTTTAGGCAAATACTGGCCTC

GACCGGAG CAC GGGGGG

CCCCTCAG

GCAATTATGTGCAGAAACAAGTGCA

PK4B: -33.960000(kcal/mol): PK_start=1598 sp=8 s1=8 s2=5 l1=3 l2=32 L3=2 PK_end=1658 (fs_start=1582)

CGG

AACAGGCAAATTTTTTAGGCAAATACTGGCCTC

GACCGGAG CA CGGGG

GCCCCAC

GCAATTATGTGCAGAAACAAGTGCACCCCTCA

=============

(9) AY623602

=============

PK1: -10.640000(kcal/mol): PK_start=2106 sp=0 s1=3 s2=7 l1=1 l2=21 L3=0 PK_end=2147 (fs_start=2140)

A

CTGGAAATGTGGACAGGAAGGTCACCAA

GTT AGAAAGT

TTTTTTAGG

CAAAAATGGAAAACAGGCAAA

PK4: -33.960000(kcal/mol): PK_start=2156 sp=8 s1=8 s2=5 l1=3 l2=23 L3=2 PK_end=2207 (fs_start=2140)

CGG

AACAGGCAAATTTTTTAGGCAAATACTGGCCTC

GACCGGAG CA CGGGG

GCCCCAT

GCAATTACTTGCAGAAACAAGTA

PK4B: -33.960000(kcal/mol): PK_start=2156 sp=8 s1=8 s2=5 l1=3 l2=32 L3=2 PK_end=2216 (fs_start=2140)

CGG

AACAGGCAAATTTTTTAGGCAAATACTGGCCTC

GACCGGAG CA CGGGG

GCCCCGC

GCAATTACTTGCAGAAACAAGTAGCCCCATCA

=============

(10) JN571034

=============

PK1: -8.130000(kcal/mol): PK_start=2038 sp=0 s1=3 s2=6 l1=1 l2=21 L3=0 PK_end=2077 (fs_start=2071)

T

TGGAAATGTGGACAGGAAGGTCACCTAA

GTT AGAAAG

TTTTTTAG

CAGAAATGGAAAACAGGCAAA

PK4: -33.960000(kcal/mol): PK_start=2087 sp=8 s1=8 s2=5 l1=3 l2=23 L3=2 PK_end=2138 (fs_start=2071)

CGG

AACAGGCAAATTTTTTAGGCAAGTACTGGCCTC

GACCGGAG CA CGGGG

GCCCCAT

GCAATTATGTACAGAAACAAGTG

PK4B: -31.080000(kcal/mol): PK_start=2087 sp=8 s1=8 s2=5 l1=3 l2=32 L3=2 PK_end=2147 (fs_start=2071)

CGG

AACAGGCAAATTTTTTAGGCAAGTACTGGCCTC

GACCGGAG CA CGGGG

GCTCCAC

GCAATTATGTACAGAAACAAGTGGCCCCATCA

=============

(14) L20587

=============

PK1: -10.640000(kcal/mol): PK_start=2117 sp=0 s1=3 s2=7 l1=1 l2=21 L3=0 PK_end=2158 (fs_start=2151)

A

CTGGAAATGTGGACAGGAAGGTCACCAA

GTT AGAAAGT

TTTTTTAGG

CAGAAATGGAAAACAGGCAAA

PK4: -33.960000(kcal/mol): PK_start=2167 sp=8 s1=8 s2=5 l1=3 l2=32 L3=2 PK_end=2227 (fs_start=2151)

CGG

AACAGGCAAATTTTTTAGGCAAATACTGGCCTC

GACCGGAG CA CGGGG

GCCCCAC

GCAATTATGTGCAGAGACCAGCACACCCATCA

**7.** 1 strains (0.02%) have two pseudoknots PK1, and PK3

=============

(1) GQ999975

=============

PK1: -12.745000(kcal/mol): PK_start=1514 sp=0 s1=3 s2=7 l1=1 l2=7 L3=0 PK_end=1541 (fs_start=1533)

A

AAAAGAAGGACACCAAATGAAAGAATGT

ACG GAAAGTC

TTTTTAGGG

GGCTAAT

PK3: -10.950000(kcal/mol): PK_start=1540 sp=0 s1=4 s2=5 l1=4 l2=4 L3=0 PK_end=1565 (fs_start=1533)

AAAA

GTACTGAAAGGCAGGCTAATTTTTTAGGG

TTCC GTTTT

CAAGGGG

CCCA

**8.** 3 strains (0.07%) have two pseudoknots PK1, and PK2

=============

(1) AF042105

=============

PK1: -13.555000(kcal/mol): PK_start=1419 sp=0 s1=4 s2=7 l1=1 l2=6 L3=0 PK_end=1447 (fs_start=1439)

A

GAAAGGAAGGACACCAGATGAAAGATTGT

GACA GAGAGTC

TTTTTAGGA

GCTAAT

PK2: -20.460000(kcal/mol): PK_start=1424 sp=0 s1=8 s2=6 l1=1 l2=8 L3=1 PK_end=1460 (fs_start=1439)

C

GAAGGACACCAGATGAAAGATTGTACTGAGAGA

GATTTTTT A ATCGGA

TGGCCTTC

GAAAAATC

**9.** 0 strains (0.00%) have two pseudoknots PK2, and PK3

**10.** 1 strains (0.02%) have two pseudoknots PK2, and PK4

=============

(1) AM000055

=============

PK2: -19.660000(kcal/mol): PK_start=2064 sp=0 s1=7 s2=7 l1=1 l2=8 L3=0 PK_end=2100 (fs_start=2078)

C

GACACCAAATGAAAGACTGCACCAATGAGAGA

ATTTTTT AATCGGA

TTGGCCTTC

GGGAAAGT

PK4: -20.650000(kcal/mol): PK_start=2093 sp=7 s1=7 s2=4 l1=1 l2=20 L3=9 PK_end=2135 (fs_start=2078)

T

AGACAGGCTAATTTTTTAGGGAAAGTTTGGCC

GGACCGG AAGGAGACA ACCT

TGGAGC

GAACTTTCCCCAGAAAAGAC

**11.** 8 strains (0.19%) have two pseudoknots PK3, and PK4

=============

(1) AF042103

=============

PK3: -25.060000(kcal/mol): PK_start=1452 sp=0 s1=6 s2=6 l1=1 l2=10 L3=0 PK_end=1486 (fs_start=1444)

A

TACTGACAGACAGGCCAATTTTTTAGGGAAG

TCCTTC CGGTCT

GCCAGGAA

ACAAGGGAAG

PK4: -26.715000(kcal/mol): PK_start=1459 sp=7 s1=10 s2=4 l1=4 l2=6 L3=0 PK_end=1496 (fs_start=1444)

CTAC

AGACAGGCCAATTTTTTAGGGAAGATCTGGCCTTC

GGACCGGAAG GGAA

TCTTCA

AAACTT

**12.** 1 strains (0.02%) have one pseudoknot PK1

=============

(1) FJ388912

=============

PK1: -10.640000(kcal/mol): PK_start=1269 sp=0 s1=3 s2=7 l1=1 l2=17 L3=0 PK_end=1306 (fs_start=1299)

A

ATTGCAAATGTGGAAAGAAAAACACCAA

GTT AGAAAGT

TTTTTTAGG

AAAGAGAGACAGGAAAA

**13.** 1 strains (0.02%) have one pseudoknot PK2

=============

(1) GU595160

=============

PK2: -17.280000(kcal/mol): PK_start=1955 sp=0 s1=8 s2=4 l1=2 l2=9 L3=2 PK_end=1989 (fs_start=1970)

CA

GAAGGACACCAAATKAVAGAWTGCACTGAGAGA

GATTTTTT AA TCGG

GGCCYY

GGAAAAHHY

**14.** 0 strains (0.00%) have one pseudoknot PK3

**15.** 3 strains (0.07%) have one pseudoknot PK4

=============

(1) AY169803

=============

PK4: -42.750000(kcal/mol): PK_start=1596 sp=8 s1=8 s2=8 l1=2 l2=20 L3=0 PK_end=1649 (fs_start=1580)

CG

AACAGGCAAATTTTTTAGGCAAATACTGGCCTC

GACCGGAG CACGGGGG

GTGCCCCCAT

GCAATTATGTGCAGAAACAA

PK4B: -36.700000(kcal/mol): PK_start=1596 sp=8 s1=8 s2=7 l1=1 l2=32 L3=2 PK_end=1658 (fs_start=1580)

C

AACAGGCAAATTTTTTAGGCAAATACTGGCCTC

GACCGGAG CA CGGGGGG

GCCCCTCCG

GCAATTATGTGCAGAAACAAGTGCCCCCATCA

**16.** 54 strains (1.27%) have none of PK1-PK4 pseudoknots

(1) AF061641

(2) AF067155

(3) AF071473

(4) AF075703

(5) AF110976

(6) AF110979

(7) AF110980

(8) AF119819

(9) AF179368

(10) AF443105

(11) AF484483

(12) AY253315

(13) AY253319

(14) AY314044

(15) AY314051

(16) AY536235

(17) AY585264

(18) AY772698

(19) AY773340

(20) AY838565

(21) DQ011176

(22) DQ164129

(23) DQ351226

(24) DQ396374

(25) EU000506

(26) EU839602

(27) FJ388891

(28) FJ388910

(29) FJ388923

(30) FJ388937

(31) FJ388956

(32) GQ999981

(33) HM067748

(34) HQ385477

(35) JF320032

(36) JF683770

(37) JF683804

(38) JF683805

(39) JN024147

(40) JN024181

(41) JN024253

(42) JN024265

(43) JN024295

(44) JN024316

(45) JN024326

(46) JN024379

(47) JN024410

(48) JN024438

(49) JN024486

(50) JN024535

(51) JN024547

(52) JN248582

(53) JX447302

(54) JX976690

**17.** 8 strains have no frameshift site

(1) AF061641

(2) AY314044

(3) AY314051

(4) JF320032

(5) JN024181

(6) JN024265

(7) JN024379

(8) JN024438

**18.** 10 strains have invalid characters within small range of frameshift site

(1) AY169805

(2) EU697908

(3) FJ389365

(4) HQ179987

(5) JA446000

(6) GU595160

(7) AY169803

(8) GU111555

(9) AY536235

(10) JN248582
